# Supplementary material
Source: publisher figshare collection journal article supplement (https://acs.figshare.com/ndownloader/files/4327876)
Supplement: Supplementary file 1 [file 4327876]

## Supporting Information

# Diphenyl Phosphate as an Efficient Cationic Organocatalyst for Controlled/Living Ring-Opening Polymerization of $\delta$ -Valerolactone and $\epsilon$ -Caprolactone

*Kosuke Makiguchi, Toshifumi Satoh, and Toyoji Kakuchi\**

Graduate School of Chemical Sciences and Engineering and Faculty of Engineering, Hokkaido  
University, Sapporo, 060-8628, Japan

Hokkaido University.

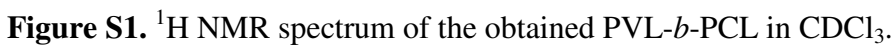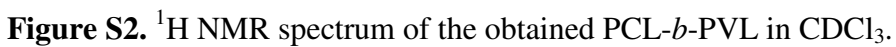

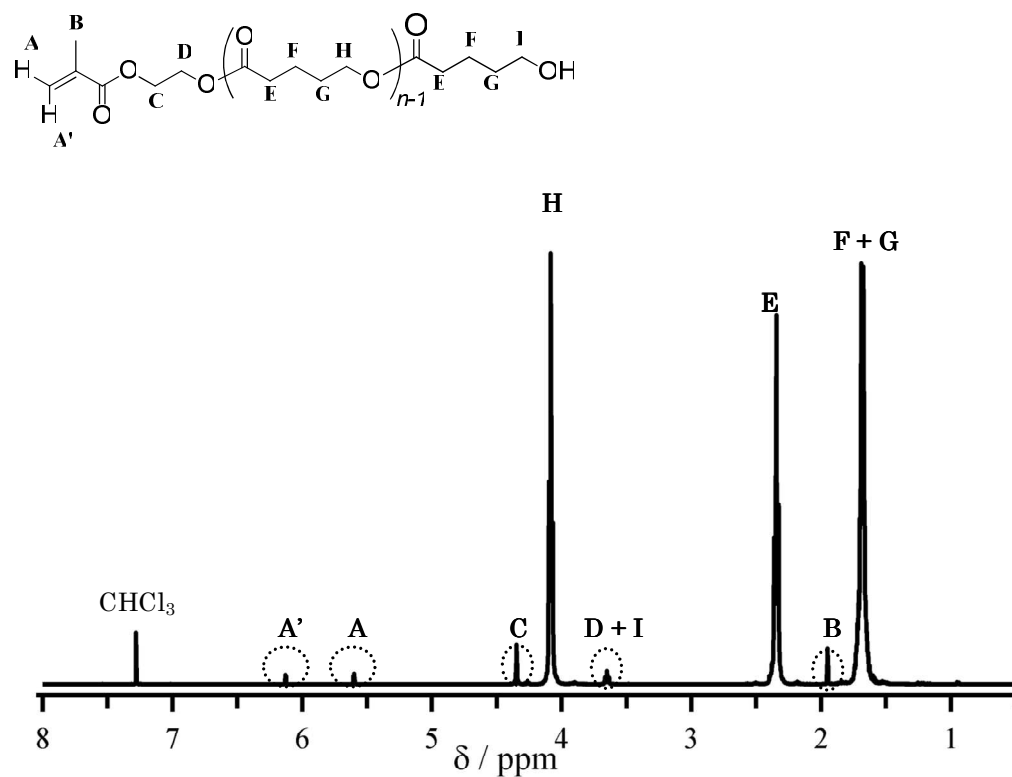

**Figure S3.**  $^1H$  NMR spectrum of the obtained PVL functionalized by HEMA (Table 2, run 1) in  $CDCl_3$ .

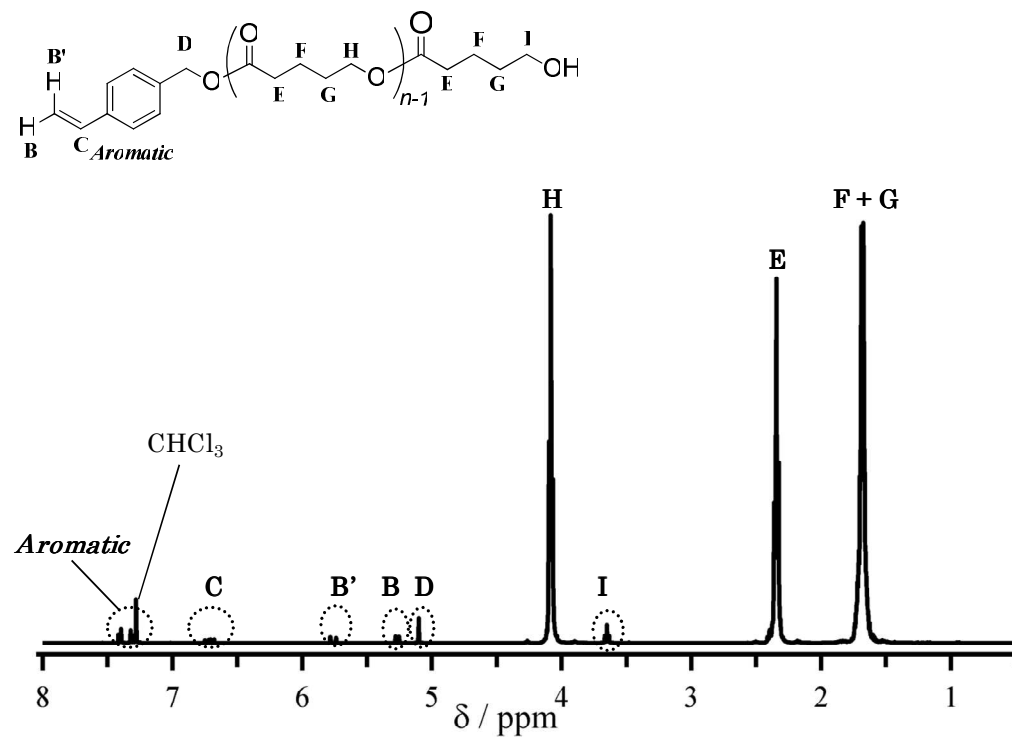

**Figure S4.**  $^1H$  NMR spectrum of the obtained PVL functionalized by VBA (Table 2, run 2) in  $CDCl_3$ .

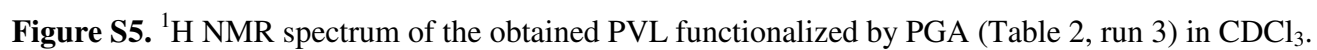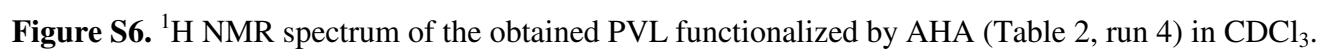

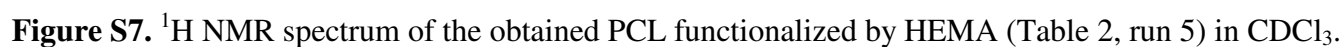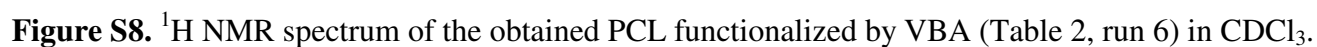

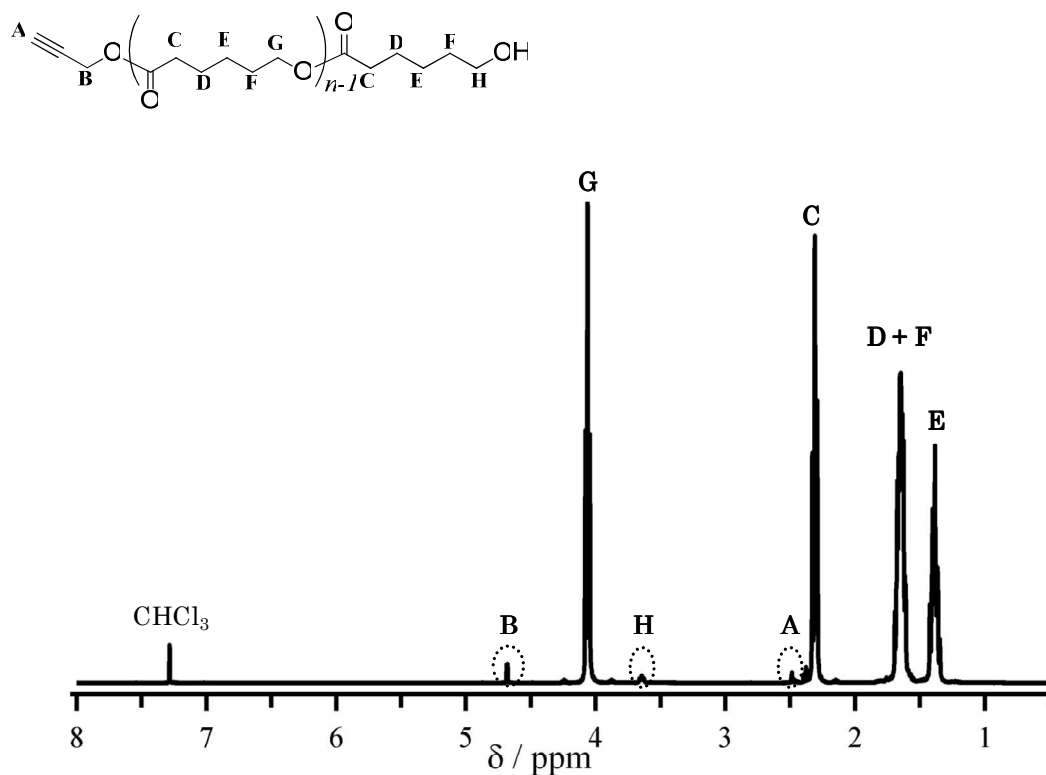

**Figure S9.** <sup>1</sup>H NMR spectrum of the obtained PCL functionalized by PGA (Table 2, run 7) in CDCl<sub>3</sub>.

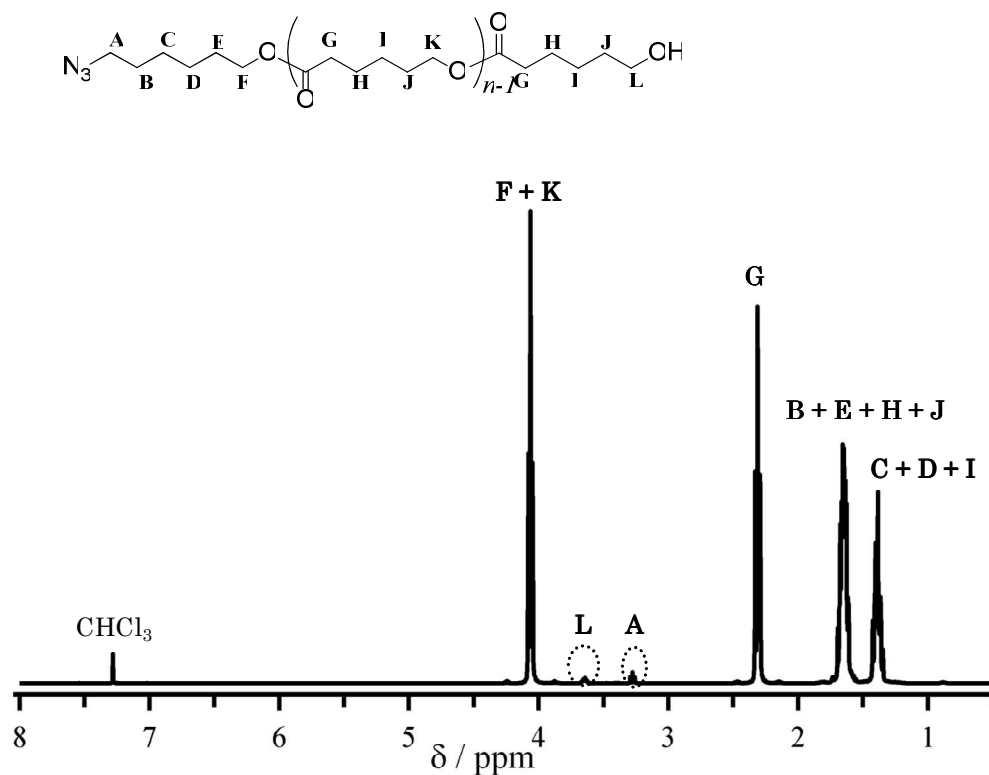

**Figure S10.** <sup>1</sup>H NMR spectrum of the obtained PCL functionalized by AHA (Table 2, run 8) in CDCl<sub>3</sub>.
